# Supplementary material for: Synergistic Effects of Salicylic Acid and Melatonin on Modulating Ion Homeostasis in Salt-Stressed Wheat (Triticum aestivum L.) Plants by Enhancing Root H+-Pump Activity
Source: MDPI journal article supplement (doi:10.3390/plants11030416), 2022-02-02
Supplement: s1 [file s1]

**Table S1.** *P*-values of the two-way analysis of the measured parameters in wheat (*Triticum aestivum* L. cv. Sids 14) plants as affected by foliar' treatments under different salinity levels. *P*-values in bold are considered significant ( $<0.05$ ,  $n = 4$ ). 'S': effect of salinity levels; 'T': effect of foliar treatments; S x T: effect of the variables' interaction.

|                                         |        | Main-factor effects |         | Significant interaction |
|-----------------------------------------|--------|---------------------|---------|-------------------------|
|                                         |        | S                   | T       | S x T                   |
| Total leaf area plant <sup>-1</sup>     |        | <0.0001             | <0.0001 | -                       |
| Shoot dry weight plant <sup>-1</sup>    |        | <0.0001             | <0.0001 | 0.2488                  |
| Root dry weight plant <sup>-1</sup>     |        | <0.0001             | <0.0001 | -                       |
| Grains number plant <sup>-1</sup>       |        | <0.0001             | <0.0001 | 0.3903                  |
| Grain yield plant <sup>-1</sup>         |        | <0.0001             | <0.0001 | -                       |
| N concentration                         | shoots | <0.0001             | <0.0001 | 0.3886                  |
|                                         | grains | <0.0001             | <0.0001 | -                       |
| P concentration                         | shoots | <0.0001             | <0.0001 | 0.0076                  |
|                                         | grains | <0.0001             | <0.0001 | 0.3777                  |
| K <sup>+</sup> concentration            | shoots | <0.0001             | <0.0001 | 0.0042                  |
|                                         | grains | <0.0001             | <0.0001 | -                       |
| Na <sup>+</sup> concentration           | shoots | <0.0001             | <0.0001 | <0.0001                 |
|                                         | grains | 0.0001              | 0.0001  | 0.1417                  |
| Ca <sup>2+</sup> concentration          | shoots | <0.0001             | <0.0001 | 0.0815                  |
|                                         | grains | <0.0001             | 0.0004  | -                       |
| Mg <sup>2+</sup> concentration          | shoots | <0.0001             | <0.0001 | 0.0574                  |
|                                         | grains | <0.0001             | <0.0001 | 0.0351                  |
| Fe concentration                        | shoots | <0.0001             | <0.0001 | 0.0627                  |
|                                         | grains | <0.0001             | <0.0001 | 0.0133                  |
| Zn concentration                        | shoots | <0.0001             | <0.0001 | 0.1949                  |
|                                         | grains | <0.0001             | <0.0001 | 0.1228                  |
| Cu concentration                        | shoots | <0.0001             | <0.0001 | 0.1268                  |
|                                         | grains | <0.0001             | <0.0001 | 0.0010                  |
| K <sup>+</sup> /Na <sup>+</sup> ratio   | shoots | <0.0001             | <0.0001 | 0.0001                  |
|                                         | grains | <0.0001             | <0.0001 | -                       |
| Ca <sup>2+</sup> /Na <sup>+</sup> ratio | shoots | 0.0003              | <0.0001 | <0.0001                 |
|                                         | grains | 0.0447              | <0.0001 | 0.1209                  |
| Mg <sup>2+</sup> /Na <sup>+</sup> ratio | shoots | 0.3091              | <0.0001 | <0.0001                 |
|                                         | grains | 0.3277              | <0.0001 | 0.0188                  |
| ATP content                             |        | <0.0001             | <0.0001 | 0.0076                  |
| PM H <sup>+</sup> -ATPase activity      |        | <0.0001             | <0.0001 | 0.0377                  |
| VM H <sup>+</sup> -ATPase activity      |        | <0.0001             | <0.0001 | 0.0098                  |
| VM H <sup>+</sup> -PPase activity       |        | <0.0001             | <0.0001 | 0.0081                  |
| Relative water content %                |        | <0.0001             | <0.0001 | 0.0009                  |
| Free amino acids concentration          |        | <0.0001             | 0.0001  | 0.0340                  |
| Superoxide content                      |        | <0.0001             | <0.0001 | <0.0001                 |
| Electrolyte leakage %                   |        | <0.0001             | <0.0001 | 0.0005                  |
| Membrane stability index %              |        | <0.0001             | <0.0001 | 0.0009                  |
| Lipxygenase activity                    |        | <0.0001             | <0.0001 | <0.0001                 |
| Superoxide dismutase activity           |        | <0.0001             | <0.0001 | <0.0001                 |
| Catalase activity                       |        | <0.0001             | <0.0001 | <0.0001                 |
| Peroxidase activity                     |        | <0.0001             | <0.0001 | <0.0001                 |
| Polyphenol oxidase activity             |        | <0.0001             | <0.0001 | <0.0001                 |

**Table S2.** Chemical properties of the soil under different salinity levels.

| Salinity<br>levels<br>EC (dS m <sup>-1</sup> ) | pH  | HCO <sub>3</sub> <sup>-</sup> + CO <sub>3</sub> <sup>2-</sup><br>(mg kg <sup>-1</sup> ) | Cl <sup>-</sup><br>(mg kg <sup>-1</sup> ) | SO <sub>4</sub> <sup>2-</sup><br>(mg kg <sup>-1</sup> ) | Ca <sup>2+</sup><br>(mg kg <sup>-1</sup> ) | Mg <sup>2+</sup><br>(mg kg <sup>-1</sup> ) | Na <sup>+</sup><br>(mg kg <sup>-1</sup> ) | K <sup>+</sup><br>(mg kg <sup>-1</sup> ) |
|------------------------------------------------|-----|-----------------------------------------------------------------------------------------|-------------------------------------------|---------------------------------------------------------|--------------------------------------------|--------------------------------------------|-------------------------------------------|------------------------------------------|
| 0.1                                            | 7.2 | 213.5                                                                                   | 324.0                                     | 430.7                                                   | 92.2                                       | 41.4                                       | 3.7                                       | 31.4                                     |
| 6.0                                            | 7.5 | 263.6                                                                                   | 1173.4                                    | 996.9                                                   | 398.5                                      | 173.9                                      | 306.7                                     | 39.7                                     |
| 12.0                                           | 7.8 | 275.4                                                                                   | 1987.8                                    | 1686.1                                                  | 886.5                                      | 314.5                                      | 808.6                                     | 52.6                                     |
